# Supplementary material
Source: MDPI journal article supplement (https://www.mdpi.com/1424-8220/14/1/346)
Supplement: s1 [file s1]

## Supplementary Information

**Development of an Antigen-DNAzyme Based Probe for a Direct Antibody-Antigen Assay Using the Intrinsic DNAzyme Activity of a Daunomycin Aptamer. *Sensors* 2014, 14, 346-355**

Noorsharmimi Omar <sup>1</sup>, Qiuting Loh <sup>1</sup>, Gee Jun Tye <sup>1</sup>, Yee Siew Choong <sup>1</sup>, Rahmah Noordin <sup>1</sup>, Jörn Glökler <sup>2</sup> and Theam Soon Lim <sup>1,\*</sup>

<sup>1</sup> Institute for Research in Molecular Medicine, Universiti Sains Malaysia, 11800 Minden, Penang, Malaysia; E-Mails: mimiez\_m5@yahoo.com.my (N.O.); qiutingloh@gmail.com (Q.L.); geejun@usm.my (G.J.T.); yeesiew@usm.my (Y.S.C.); rahmah@usm.my (R.N.)

<sup>2</sup> Department of Molecular Biotechnology and Functional Genomics, Technical University of Applied Sciences Wildau, Bahnhofstr. 1, 15745 Wildau, Germany; E-Mail: gloekler@th-wildau.de

\* Author to whom correspondence should be addressed; E-Mail: theamsoon@usm.my; Tel.: +604-653-4801; Fax: +604-653-4803.

**Supplementary Figure 1.** Normalized UV-Vis spectra analysis of hemin/G-quadruplex structures formation in aqueous solution containing K<sup>+</sup>/Na<sup>+</sup> ions carried out in the absence of ABTS reaction with the complex.

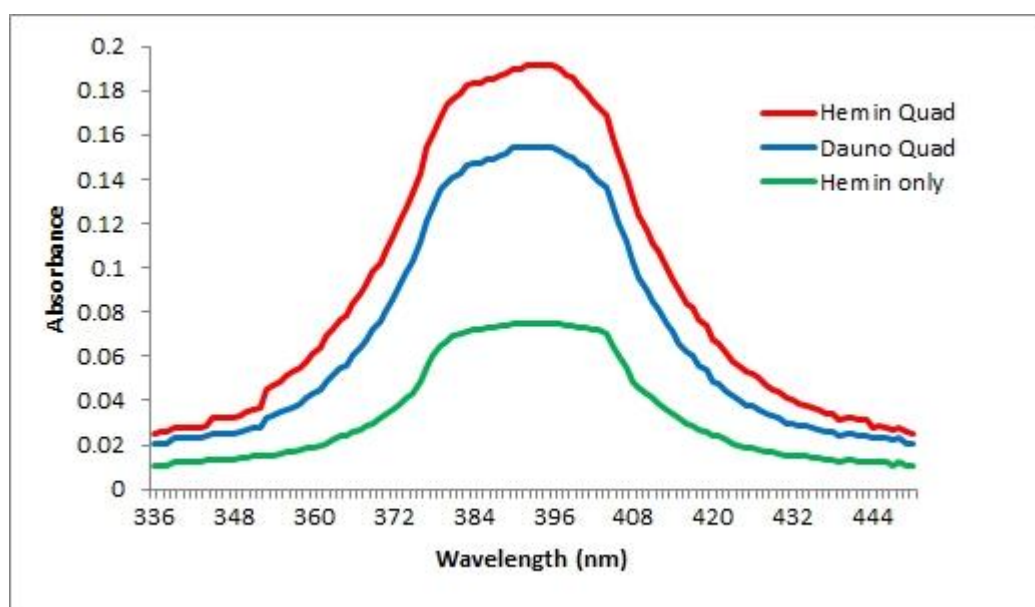

**Supplementary Figure 2.** UV spectroscopy analysis at 300 nm to 700 nm of peroxide catalyzed oxidation of ABTS. **(A)** 5 mM hemin standard in DMSO and G-4-hemin aptamer with 5 mM hemin in HEPES buffer, pH 7.2 at room temperature; **(B)** 5 mM daunomycin standard in DMSO and daunomycin aptamer in HEPES buffer, pH 7.2 at room temperature. The 405 nm absorbance shows the ABTS reaction with the ligands independently and aptamers.

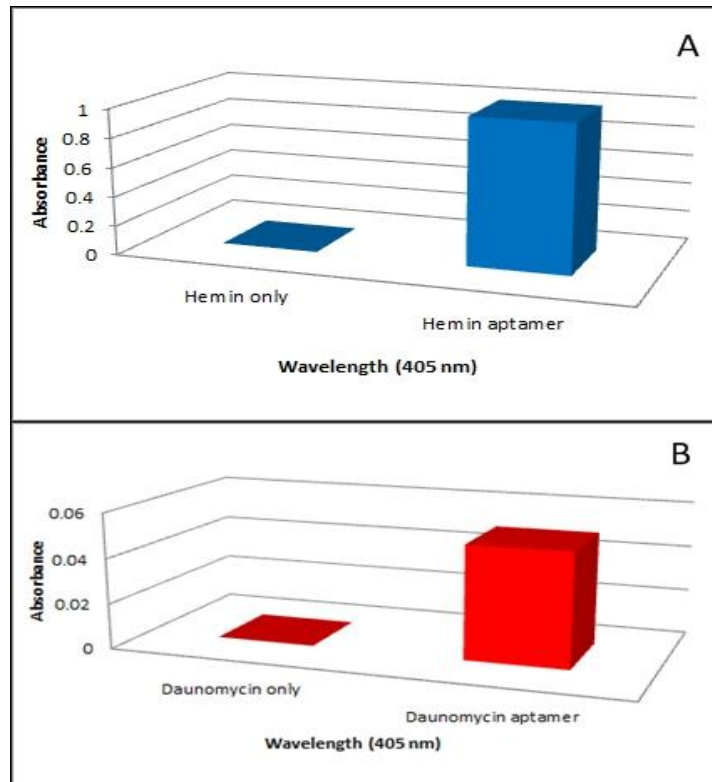

© 2013 by the authors; licensee MDPI, Basel, Switzerland. This article is an open access article distributed under the terms and conditions of the Creative Commons Attribution license (<http://creativecommons.org/licenses/by/3.0/>).
